# Supplementary material for: Environmental Enrichment Enhances Cav 2.1 Channel-Mediated Presynaptic Plasticity in Hypoxic–Ischemic Encephalopathy
Source: MDPI journal article supplement (doi:10.3390/ijms22073414), 2021-03-26
Supplement: s1 [file s1]

**Supplementary Table S1.** List of primers used for qRT-PCR quantification

| <b>Gene</b>       | <b>Forward primer</b>   | <b>Reverse primer</b>    |
|-------------------|-------------------------|--------------------------|
| <i>RIM</i>        | CAAACGTGTCCCCAAGTCTGT   | CAGTACCTAGTCTGATCCTC     |
| <i>Munc13</i>     | GCTCACAGAGTCGTTTCCTCC   | GGTGGTCTGCCAGTTTAGGT     |
| <i>Raphilin3A</i> | CCAAGACAACAGCAACCTGC    | CCAAGACAACAGCAACCTGC     |
| <i>Munc18</i>     | CGGTCCCCGCCTCATTATTT    | CTGAAGTCGGGGTGCTCAG      |
| <i>VAMP2</i>      | GAGCGGGACCAGAAGTTGTC    | GCGCAGATCACTCCCAAGATG    |
| <i>SNAP25</i>     | GGATGAGCAAGGCGAACAAC    | TCCTGATTATTGCCCCAGGC     |
| <i>Syntaxin</i>   | AGGATCGGACTCAGGAGCTG    | CTCACCTGGCTCTCTACGA      |
| <i>CACNA1A</i>    | CACGACACACAGACAGTTCC    | AGCGGGCGAGTAGGACAC       |
| <i>GAPDH</i>      | CATCACTGCCACCCAGAAGACTG | ATGCCAGTGAGCTTCCCGTTTCAG |

GAPDH: Glyceraldehyde 3-phosphate dehydrogenase was used as an internal control; CACNA1A: The gene name of Ca<sub>v</sub> 2.1 channel.
